# Supplementary material
Source: HighWire-hosted journal article supplement (https://erj.ersjournals.com/content/50/5/1700280)
Supplement: inline-supplementary-material-1 [file inline-supplementary-material-1.pdf]

## **Online Data Supplement**

### **Sex-specific impact of asthma during pregnancy on infant gut microbiota**

Petya T. Koleva<sup>1</sup>, Hein M. Tun<sup>1</sup>, Theodore Konya<sup>2</sup>, David S. Guttman<sup>3</sup>, Allan B. Becker<sup>4</sup>, Piush J. Mandhane<sup>1</sup>, Stuart E. Turvey<sup>5</sup>,  
Padmaja Subbarao<sup>6</sup>, Malcolm R. Sears<sup>7</sup>, CHILD Study Investigators<sup>8</sup>, James A. Scott<sup>2</sup>, Anita L. Kozyrskyj<sup>1</sup>

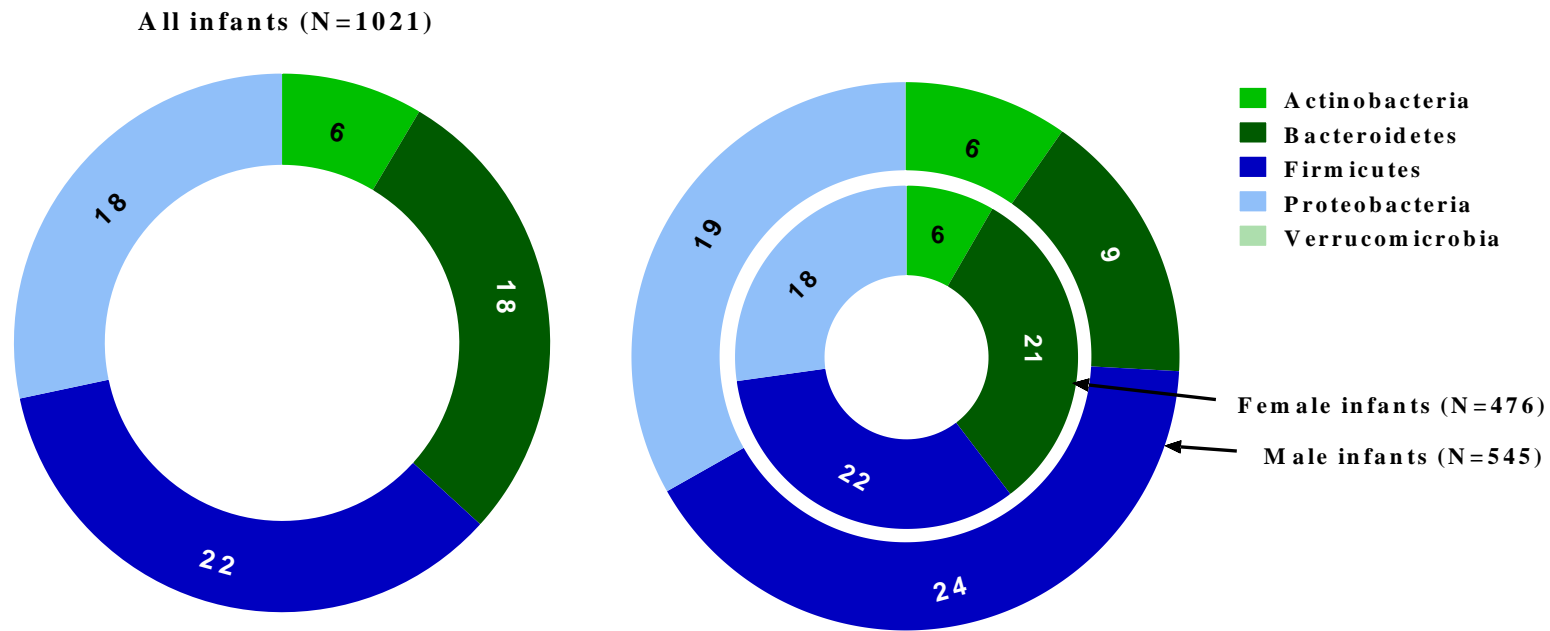

**Figure S1.** Median relative abundance of bacterial taxa at the phylum level in infant gut microbiota at 3-4 months, by infant sex.

**Table S1.** Median relative abundance of bacterial phyla, and microbial richness and diversity in infant gut microbiota at 3-4 months, according to maternal prenatal asthma and infant sex.

|                          | All infants            |                        |         | Female infants          |                        |             | Male infants            |                         |         |
|--------------------------|------------------------|------------------------|---------|-------------------------|------------------------|-------------|-------------------------|-------------------------|---------|
|                          | No Asthma<br>(n=934)   | Asthma<br>(n=87)       | Crude p | No Asthma<br>(n=430)    | Asthma<br>(n=46)       | Crude p     | No Asthma<br>(n=504)    | Asthma<br>(n=41)        | Crude p |
| <b>Alpha metrics</b>     |                        |                        |         |                         |                        |             |                         |                         |         |
| Chao1 richness estimator | 342.3<br>(285.4-403.8) | 365.5<br>(300.6-400.3) | 0.19    | 349.4<br>(289.6-409.0)  | 371.8<br>(304.4-411.3) | 0.53        | 335.7<br>(283.7-395.6)  | 362.5<br>(298.8-396.1)  | 0.25    |
| Shannon diversity index  | 3.1<br>(2.6-3.6)       | 3.1<br>(2.5-3.6)       | 0.90    | 3.1<br>(2.7-3.6)        | 3.2<br>(2.4-3.4)       | 0.70        | 3.1<br>(2.6-3.5)        | 3.0<br>(2.7-3.6)        | 0.61    |
| Simpson diversity index  | 0.77<br>(0.66-0.83)    | 0.54<br>(0.42-0.63)    | 0.95    | 0.78<br>(0.67-0.84)     | 0.76<br>(0.65-0.84)    | 0.57        | 0.76<br>(0.65-0.83)     | 0.75<br>(0.70-0.85)     | 0.51    |
| <b>Bacterial phyla</b>   |                        |                        |         |                         |                        |             |                         |                         |         |
| Actinobacteria           | 5.7<br>(1.4-15.3)      | 4.7<br>(1.4-15.0)      | 0.97    | 5.7<br>(1.6-14.7)       | 5.1<br>(1.7-15.0)      | 0.74        | 5.7<br>(1.2-17.3)       | 3.9<br>(1.4-14.6)       | 0.71    |
| Bacteroidetes            | 17.7<br>(0.1-60.3)     | 24.1<br>(0.1-70.4)     | 0.20    | 19.1<br>(0.1-60.4)      | 34.8<br>(0.2-72.9)     | 0.08        | 12.0<br>(0.1-60.2)      | 0.8<br>(0.1-69.4)       | 0.99    |
| Firmicutes               | 23.4<br>(9.0-44.8)     | 18.0<br>(7.5-41.2)     | 0.31    | 23.1<br>(9.7-47.0)      | 16.5<br>(5.6-31.3)     | <b>0.03</b> | 23.5<br>(8.9-43.5)      | 27.4<br>(10.6-52.6)     | 0.40    |
| Proteobacteria           | 18.5<br>(7.9-40.4)     | 15.4<br>(8.2-35.1)     | 0.21    | 18.2<br>(8.4-40.1)      | 13.8<br>(8.2-32.6)     | 0.34        | 19.3<br>(7.7-40.4)      | 16.9<br>(7.0-35.1)      | 0.43    |
| Verrucomicrobia          | 0.002<br>(0.0003-0.01) | 0.002<br>(0.0004-0.01) | 0.87    | 0.003<br>(0.0004-0.006) | 0.002<br>(0.0-0.008)   | 0.95        | 0.002<br>(0.0003-0.006) | 0.002<br>(0.0005-0.006) | 0.88    |

Results are presented as median and inter quartile range in brackets. Comparisons were performed by Wilcoxon rank sum test. FDR was used to adjust p values for multiple testing, and p values <FDR p are indicated with ‘\*’. P values <0.05 are indicated in boldface type.

**Table S2.** Median relative abundance of bacterial taxa in infant gut microbiota at 3-4 months, according to maternal prenatal asthma and infant sex. Comparisons were restricted to vaginally-delivered, breastfed infants not exposed to maternal antibiotics during birth.

| Bacterial taxa            | Female infants                                                                                         |                      |              | Male infants                                                                                           |                    |            |
|---------------------------|--------------------------------------------------------------------------------------------------------|----------------------|--------------|--------------------------------------------------------------------------------------------------------|--------------------|------------|
|                           | Restricted to vaginally-delivered, breastfed infants, not exposed to maternal antibiotics during birth |                      |              | Restricted to vaginally-delivered, breastfed infants, not exposed to maternal antibiotics during birth |                    |            |
|                           | No Asthma<br>(n=186)                                                                                   | Asthma<br>(n=21)     | Crude<br>p   | No Asthma<br>(n=208)                                                                                   | Asthma<br>(n=11)   | Crude<br>p |
| <b>Actinobacteria</b>     | 7.0 (2.0-19.0)                                                                                         | 6.4 (2.5-13.5)       | -            | 6.8 (2.3-18.5)                                                                                         | 12.7 (2.0-26.6)    | -          |
| <i>Actinomycetaceae</i>   | 0.03 (0.005-0.1)                                                                                       | 0.01 (0.003-0.03)    | 0.07         | 0.01 (0.001-0.06)                                                                                      | 0.02 (0.002-0.09)  | -          |
| <i>Actinomyces</i>        | 0.03 (0.003-0.1)                                                                                       | 0.007 (0.001-0.02)   | 0.08         | 0.008 (0.001-0.04)                                                                                     | 0.009 (0.002-0.03) | -          |
| <i>Bifidobacteriaceae</i> | 6.6 (1.8-18.4)                                                                                         | 6.4 (1.7-13.4)       | -            | 6.2 (2.0-17.8)                                                                                         | 12.2 (1.8-26.6)    | -          |
| <i>Bifidobacterium</i>    | 6.6 (1.8-18.4)                                                                                         | 6.4 (1.7-13.4)       | -            | 6.2 (2.0-17.8)                                                                                         | 12.2 (1.8-26.6)    | -          |
| <b>Bacteroidetes</b>      | 33.2 (0.8-63.2)                                                                                        | 65.3 (28.1-78.5)     | <b>0.01*</b> | 40.2 (0.5-67.8)                                                                                        | 50.3 (0.2-78.8)    | -          |
| <i>Bacteroidaceae</i>     | 27.1 (0.3-60.8)                                                                                        | 52.3 (28.1-76.8)     | <b>0.02*</b> | 35.6 (0.4-60.8)                                                                                        | 22.6 (0.1-58.7)    | -          |
| <i>Bacteroides</i>        | 27.1 (0.3-60.8)                                                                                        | 52.3 (28.1-76.8)     | <b>0.02*</b> | 35.6 (0.4-60.8)                                                                                        | 22.6 (0.1-58.7)    | -          |
| <i>Porphyromonadaceae</i> | 0.006 (0.002-0.2)                                                                                      | 0.007 (0.002-2.4)    | -            | 0.005 (0.001-0.7)                                                                                      | 0.02 (0.002-13.7)  | -          |
| <b>Firmicutes</b>         | 16.0 (7.2-33.9)                                                                                        | 9.3 (3.4-17.1)       | <b>0.05</b>  | 14.6 (5.9-30.6)                                                                                        | 21.5 (6.8-34.9)    | -          |
| <i>Lactobacillaceae</i>   | 0.003 (0.0002-0.07)                                                                                    | 0.003 (0.0003-0.03)  | -            | 0.003 (0.0-0.05)                                                                                       | 0.0005 (0.0-0.002) | 0.06       |
| <i>Lactobacillus</i>      | 0.003 (0.0002-0.07)                                                                                    | 0.003 (0.0003-0.03)  | -            | 0.003 (0.0-0.05)                                                                                       | 0.0005 (0.0-0.002) | 0.06       |
| <i>Clostridiaceae</i>     | 0.2 (0.02-2.2)                                                                                         | 0.2 (0.03-0.7)       | -            | 0.07 (0.01-0.8)                                                                                        | 0.4 (0.02-2.5)     | -          |
| <i>Clostridium</i>        | 0.02 (0.004-0.7)                                                                                       | 0.005 (0.002-0.5)    | -            | 0.006 (0.002-0.1)                                                                                      | 0.008 (0.002-0.4)  | -          |
| <i>Lachnospiraceae</i>    | 1.8 (0.03-7.9)                                                                                         | 0.7 (0.3-4.5)        | -            | 1.1 (0.03-5.8)                                                                                         | 2.1 (0.3-15.6)     | -          |
| <i>Blautia</i>            | 0.0006 (0.0-0.003)                                                                                     | 0.001 (0.0-0.02)     | -            | 0.0007 (0.0-0.003)                                                                                     | 0.001 (0.0-0.1)    | -          |
| <i>Dorea</i>              | 0.0003 (0.0-0.002)                                                                                     | 0.001 (0.0003-0.005) | <b>0.03*</b> | 0.0004 (0.0-0.002)                                                                                     | 0.0 (0.0-0.002)    | -          |
| <i>Ruminococcaceae</i>    | 0.03 (0.003-0.7)                                                                                       | 0.06 (0.004-1.9)     | -            | 0.04 (0.002-0.7)                                                                                       | 0.03 (0.003-1.1)   | -          |
| <i>Ruminococcus</i>       | 0.0006 (0.0-0.04)                                                                                      | 0.0005 (0.0-0.05)    | -            | 0.0009 (0.0-0.05)                                                                                      | 0.0003 (0.0-0.01)  | -          |
| <i>Veillonellaceae</i>    | 3.2 (0.4-12.2)                                                                                         | 1.6 (0.5-4.3)        | -            | 2.3 (0.4-12.7)                                                                                         | 2.6 (0.4-10.9)     | -          |

|                                   |                      |                    |              |                      |                       |   |
|-----------------------------------|----------------------|--------------------|--------------|----------------------|-----------------------|---|
| <i>Dialister</i>                  | 0.0007 (0.0-0.006)   | 0.001 (0.0-0.005)  | -            | 0.0004 (0.0-0.003)   | 0.0003 (0.0-0.02)     | - |
| <i>Megasphaera</i>                | 0.001 (0.0-0.006)    | 0.0006 (0.0-0.001) | 0.11         | 0.0009 (0.0-0.005)   | 0.0005 (0.0003-0.006) | - |
| <i>Veillonella</i>                | 1.9 (0.2-11.1)       | 1.3 (0.1-4.2)      | -            | 1.5 (0.2-7.4)        | 0.5 (0.1-2.6)         | - |
| <b>Proteobacteria</b>             | 19.4 (10.0-35.7)     | 9.8 (8.2-22.6)     | <b>0.04</b>  | 16.2 (7.4-41.2)      | 13.8 (10.8-28.2)      | - |
| <u><i>Enterobacteriaceae</i></u>  | 17.8 (7.0-34.2)      | 9.7 (5.5-16.5)     | <b>0.03*</b> | 15.1 (5.9-39.6)      | 13.8 (6.8-27.9)       | - |
| <b>Verrucomicrobia</b>            | 0.001 (0.0004-0.005) | 0.002 (0.0-0.006)  | -            | 0.002 (0.0002-0.006) | 0.0007 (0.0-0.003)    | - |
| <u><i>Verrucomicrobiaceae</i></u> | 0.001 (0.0004-0.005) | 0.002 (0.0-0.006)  | -            | 0.002 (0.0002-0.006) | 0.0007 (0.0-0.003)    | - |
| <i>Akkermansia</i>                | 0.001 (0.0004-0.005) | 0.002 (0.0-0.006)  | -            | 0.002 (0.0002-0.006) | 0.0007 (0.0-0.003)    | - |

Results are presented as median and inter quartile range in brackets. Comparisons were performed by Wilcoxon rank sum test. FDR was used to adjust p values

for multiple testing, and p values <FDR p are indicated with '\*'. P values <0.05 are indicated in boldface type.

\*Comparison of *Lactobacillaceae* family was the primary hypothesis.

**Table S3.** Median relative abundance of bacterial taxa at phylum, family and genus level in fecal microbiota at 3-4 months according to maternal asthma during pregnancy, restricted to Caucasian mothers and stratified by prenatal maternal allergy status.

| Bacterial taxa            | Maternal allergies during pregnancy<br>Restricted to Caucasian mothers |                    |              | No maternal allergies during pregnancy<br>Restricted to Caucasian mothers |                     |                 |
|---------------------------|------------------------------------------------------------------------|--------------------|--------------|---------------------------------------------------------------------------|---------------------|-----------------|
|                           | No Asthma<br>(n=429)                                                   | Asthma<br>(n=64)   | Crude<br>p   | No Asthma<br>(n=278)                                                      | Asthma<br>(n=10)    | Crude<br>p      |
| <b>Actinobacteria</b>     | 6.1 (1.5-16.9)                                                         | 4.7 (1.4-18.6)     | -            | 5.5 (1.5-15.1)                                                            | 4.6 (0.7-36.1)      | -               |
| <i>Actinomycetaceae</i>   | 0.03 (0.005-0.1)                                                       | 0.03 (0.008-0.09)  | -            | 0.03 (0.004-0.1)                                                          | 0.003 (0.0008-0.03) | <b>&lt;0.04</b> |
| <i>Actinomyces</i>        | 0.02 (0.004-0.09)                                                      | 0.02 (0.005-0.09)  | -            | 0.03 (0.004-0.1)                                                          | 0.003 (0.0008-0.03) | <b>&lt;0.04</b> |
| <i>Bifidobacteriaceae</i> | 5.4 (1.3-16.1)                                                         | 4.3 (1.3-15.0)     | -            | 4.9 (1.1-13.8)                                                            | 4.5 (1.1-21.7)      | -               |
| <i>Bifidobacterium</i>    | 5.4 (1.3-16.1)                                                         | 4.3 (1.3-15.0)     | -            | 4.9 (1.1-13.8)                                                            | 4.5 (1.1-21.7)      | -               |
| <b>Bacteroidetes</b>      | 13.3 (0.1-57.6)                                                        | 32.6 (0.2-72.4)    | 0.08         | 24.3 (0.1-68.1)                                                           | 0.4 (0.09-34.2)     | -               |
| <i>Bacteroidaceae</i>     | 8.4 (0.07-53.0)                                                        | 28.0 (0.1-67.2)    | 0.09         | 18.0 (0.09-61.7)                                                          | 0.1 (0.06-34.2)     | -               |
| <i>Bacteroides</i>        | 8.4 (0.07-53.0)                                                        | 28.0 (0.1-67.2)    | 0.09         | 18.0 (0.09-61.7)                                                          | 0.1 (0.06-34.2)     | -               |
| <i>Porphyromonadaceae</i> | 0.005 (0.002-0.2)                                                      | 0.006 (0.002-1.0)  | -            | 0.004 (0.002-0.09)                                                        | 0.006 (0.003-0.02)  | -               |
| <b>Firmicutes</b>         | 22.2 (10.1-44.7)                                                       | 17.2 (7.8-35.8)    | -            | 24.4 (7.8-47.6)                                                           | 26.8 (3.2-75.5)     | -               |
| <i>Lactobacillaceae</i>   | 0.002 (0.0-0.05)                                                       | 0.0005 (0.0-0.009) | <b>0.03*</b> | 0.003 (0.0-0.05)                                                          | 0.0009 (0.0-0.003)  | -               |
| <i>Lactobacillus</i>      | 0.002 (0.0-0.05)                                                       | 0.0005 (0.0-0.009) | <b>0.03*</b> | 0.003 (0.0-0.05)                                                          | 0.0009 (0.0-0.003)  | -               |
| <i>Clostridiaceae</i>     | 0.3 (0.03-2.5)                                                         | 0.2 (0.02-2.0)     | -            | 0.5 (0.06-2.5)                                                            | 0.3 (0.09-0.8)      | -               |
| <i>Clostridium</i>        | 0.02 (0.003-0.5)                                                       | 0.01 (0.003-0.4)   | -            | 0.03 (0.004-0.8)                                                          | 0.007 (0.004-0.3)   | -               |
| <i>Lachnospiraceae</i>    | 2.9 (0.1-9.8)                                                          | 2.4 (0.2-9.6)      | -            | 3.1 (0.05-10.8)                                                           | 3.9 (0.2-32.0)      | -               |
| <i>Blautia</i>            | 0.002 (0.0-0.07)                                                       | 0.001 (0.0-0.04)   | -            | 0.001 (0.0-0.03)                                                          | 0.02 (0.0-0.1)      | -               |
| <i>Dorea</i>              | 0.0004 (0.0-0.003)                                                     | 0.0004 (0.0-0.004) | -            | 0.0005 (0.0-0.003)                                                        | 0.002 (0.0-0.03)    | -               |
| <i>Ruminococcaceae</i>    | 0.1 (0.006-1.6)                                                        | 0.1 (0.004-1.2)    | -            | 0.09 (0.003-1.7)                                                          | 0.1 (0.005-4.2)     | -               |
| <i>Ruminococcus</i>       | 0.001 (0.0-0.07)                                                       | 0.0004 (0.0-0.04)  | -            | 0.0007 (0.0-0.06)                                                         | 0.02 (0.0005-0.06)  | -               |
| <i>Veillonellaceae</i>    | 4.0 (0.7-15.4)                                                         | 4.9 (1.0-14.0)     | -            | 4.8 (0.8-16.8)                                                            | 0.7 (0.2-4.3)       | -               |
| <i>Dialister</i>          | 0.0006 (0.0-0.004)                                                     | 0.0004 (0.0-0.003) | -            | 0.0004 (0.0-0.003)                                                        | 0.0001 (0.0-0.01)   | -               |
| <i>Megasphaera</i>        | 0.001 (0.0-0.007)                                                      | 0.0005 (0.0-0.003) | <b>0.02*</b> | 0.0008 (0.0-0.006)                                                        | 0.002 (0.0-0.004)   | -               |

|                                   |                      |                   |               |                      |                   |              |
|-----------------------------------|----------------------|-------------------|---------------|----------------------|-------------------|--------------|
| <i>Veillonella</i>                | 2.8 (0.4-13.6)       | 3.0 (0.3-12.4)    | -             | 2.8 (0.4-14.6)       | 0.7 (0.1-4.3)     | -            |
| <b>Proteobacteria</b>             | 18.7 (8.5-40.9)      | 14.5 (8.0-32.0)   | 0.09          | 16.0 (6.5-34.0)      | 19.6 (10.1-32.6)  | -            |
| <u><i>Enterobacteriaceae</i></u>  | 16.3 (6.8-39.3)      | 10.4 (4.6-21.4)   | <b>0.01</b> * | 15.0 (4.5-32.0)      | 19.6 (8.7-32.6)   | -            |
| <b>Verrucomicrobia</b>            | 0.001 (0.0004-0.006) | 0.001 (0.0-0.004) | 0.11          | 0.002 (0.0004-0.007) | 0.01 (0.005-0.01) | <b>0.02</b>  |
| <u><i>Verrucomicrobiaceae</i></u> | 0.001 (0.0004-0.006) | 0.001 (0.0-0.004) | 0.11          | 0.002 (0.0004-0.007) | 0.01 (0.005-0.01) | <b>0.02*</b> |
| <i>Akkermansia</i>                | 0.001 (0.0004-0.006) | 0.001 (0.0-0.004) | 0.11          | 0.002 (0.0004-0.007) | 0.01 (0.005-0.01) | <b>0.02</b>  |

Results are presented as median and inter quartile range in brackets. Comparisons were performed by Wilcoxon rank sum test. FDR was used to adjust p values

for multiple testing, and p values <FDR p are indicated with '\*'. P values <0.05 are indicated in boldface type.

\*Comparison of *Lactobacillaceae* family was the primary hypothesis.

**Table S4.** Median relative abundance of bacterial taxa at phylum, family and genus level in fecal microbiota at 3-4 months according to maternal asthma during pregnancy, restricted to Caucasian mothers and stratified by maternal pre-pregnancy weight.

| Bacterial taxa                       | Overweight / Obese before pregnancy<br>Restricted to Caucasian mothers |                    |            | Normal pre-pregnancy weight<br>Restricted to Caucasian mothers |                    |            |
|--------------------------------------|------------------------------------------------------------------------|--------------------|------------|----------------------------------------------------------------|--------------------|------------|
|                                      | No Asthma<br>(n=291)                                                   | Asthma<br>(n=33)   | Crude<br>p | No Asthma<br>(n=407)                                           | Asthma<br>(n=36)   | Crude<br>p |
| <b>Actinobacteria</b>                | 6.2 (1.8-15.5)                                                         | 5.4 (1.8-22.2)     | -          | 5.1 (1.0-16.3)                                                 | 4.6 (1.0-14.1)     | -          |
| <i>Actinomycetaceae</i>              | 0.03 (0.006-0.1)                                                       | 0.02 (0.007-0.08)  | -          | 0.02 (0.004-0.1)                                               | 0.03 (0.002-0.09)  | -          |
| <i>Actinomyces</i>                   | 0.03 (0.005-0.1)                                                       | 0.02 (0.005-0.07)  | -          | 0.02 (0.003-0.09)                                              | 0.02 (0.002-0.09)  | -          |
| <i>Bifidobacteriaceae</i>            | 5.2 (1.2-14.4)                                                         | 4.9 (1.6-21.5)     | -          | 4.9 (0.8-15.8)                                                 | 4.3 (0.8-14.0)     | -          |
| <i>Bifidobacterium</i>               | 5.2 (1.2-14.4)                                                         | 4.9 (1.6-21.5)     | -          | 4.9 (0.8-15.8)                                                 | 4.3 (0.8-14.0)     | -          |
| <b>Bacteroidetes</b>                 | 23.1 (0.09-63.3)                                                       | 32.6 (0.2-77.3)    | -          | 12.4 (0.1-59.5)                                                | 26.1 (0.1-67.4)    | -          |
| <i>Bacteroidaceae</i>                | 14.0 (0.07-55.8)                                                       | 31.8 (0.09-68.4)   | -          | 6.8 (0.07-55.3)                                                | 23.4 (0.09-56.5)   | -          |
| <i>Bacteroides</i>                   | 14.0 (0.07-55.8)                                                       | 31.8 (0.09-68.4)   | -          | 6.8 (0.07-55.3)                                                | 23.4 (0.09-56.5)   | -          |
| <i>Porphyromonadaceae</i>            | 0.005 (0.002-0.3)                                                      | 0.004 (0.002-0.8)  | -          | 0.005 (0.002-0.1)                                              | 0.007 (0.003-0.5)  | -          |
| <b>Firmicutes</b>                    | 21.1 (9.1-43.1)                                                        | 10.9 (6.2-33.0)    | -          | 24.3 (8.9-47.5)                                                | 21.3 (10.1-47.1)   | -          |
| <sup>‡</sup> <i>Lactobacillaceae</i> | 0.001 (0.0-0.04)                                                       | 0.0004 (0.0-0.004) | <0.04      | 0.003 (0.0-0.06)                                               | 0.001 (0.0-0.009)  | 0.10       |
| <sup>‡</sup> <i>Lactobacillus</i>    | 0.001 (0.0-0.04)                                                       | 0.0004 (0.0-0.004) | <0.04      | 0.003 (0.0-0.06)                                               | 0.001 (0.0-0.009)  | 0.10       |
| <i>Clostridiaceae</i>                | 0.5 (0.06-2.3)                                                         | 0.2 (0.04-1.0)     | -          | 0.3 (0.03-2.8)                                                 | 0.5 (0.009-3.3)    | -          |
| <i>Clostridium</i>                   | 0.02 (0.003-0.3)                                                       | 0.01 (0.003-0.3)   | -          | 0.02 (0.004-1.0)                                               | 0.01 (0.003-0.6)   | -          |
| <i>Lachnospiraceae</i>               | 3.9 (0.5-10.0)                                                         | 3.2 (0.2-9.2)      | -          | 2.0 (0.04-10.7)                                                | 2.7 (0.1-13.6)     | -          |
| <i>Blautia</i>                       | 0.002 (0.0-0.3)                                                        | 0.0007 (0.0-0.05)  | -          | 0.001 (0.0-0.007)                                              | 0.001 (0.0002-0.1) | -          |
| <i>Dorea</i>                         | 0.0006 (0.0-0.008)                                                     | 0.0009 (0.0-0.009) | -          | 0.0004 (0.0-0.002)                                             | 0.0003 (0.0-0.002) | -          |
| <i>Ruminococcaceae</i>               | 0.3 (0.009-2.1)                                                        | 0.4 (0.006-2.1)    | -          | 0.07 (0.003-1.3)                                               | 0.02 (0.004-0.8)   | -          |
| <i>Ruminococcus</i>                  | 0.003 (0.0-0.09)                                                       | 0.002 (0.0-0.06)   | -          | 0.0005 (0.0-0.06)                                              | 0.0004 (0.0-0.04)  | -          |
| <i>Veillonellaceae</i>               | 4.1 (0.8-15.8)                                                         | 2.6 (0.5-7.8)      | -          | 4.2 (0.6-16.8)                                                 | 9.0 (1.1-18.2)     | -          |



|                                   |                      |                     |               |                      |                    |   |
|-----------------------------------|----------------------|---------------------|---------------|----------------------|--------------------|---|
| <i>Dialister</i>                  | 0.0005 (0.0-0.004)   | 0.0 (0.0-0.003)     | -             | 0.0005 (0.0-0.004)   | 0.0007 (0.0-0.003) | - |
| <i>Megasphaera</i>                | 0.001 (0.0-0.007)    | 0.0004 (0.0-0.001)  | <b>0.009*</b> | 0.001 (0.0-0.005)    | 0.0009 (0.0-0.004) | - |
| <i>Veillonella</i>                | 2.4 (0.3-13.2)       | 2.6 (0.2-7.7)       | -             | 3.2 (0.4-15.1)       | 3.6 (0.3-14.0)     | - |
| <b>Proteobacteria</b>             | 16.4 (6.5-38.9)      | 16.6 (5.5-24.8)     | -             | 19.1 (9.3-39.5)      | 14.1 (9.9-33.3)    | - |
| <u><i>Enterobacteriaceae</i></u>  | 14.4 (4.7-36.7)      | 14.8 (1.9-21.8)     | -             | 17.6 (7.2-37.2)      | 10.4 (6.5-31.8)    | - |
| <b>Verrucomicrobia</b>            | 0.002 (0.0006-0.007) | 0.003 (0.0009-0.01) | -             | 0.002 (0.0004-0.006) | 0.002 (0.0-0.004)  | - |
| <u><i>Verrucomicrobiaceae</i></u> | 0.002 (0.0006-0.007) | 0.003 (0.0009-0.01) | -             | 0.002 (0.0004-0.006) | 0.002 (0.0-0.004)  | - |
| <i>Akkermansia</i>                | 0.002 (0.0006-0.007) | 0.003 (0.0009-0.01) | -             | 0.002 (0.0004-0.006) | 0.002 (0.0-0.004)  | - |

Results are presented as median and inter quartile range in brackets. Comparisons were performed by Wilcoxon rank sum test. FDR was used to adjust p values

for multiple testing, and p values <FDR p are indicated with '\*'. P values <0.05 are indicated in boldface type.

\*Comparison of *Lactobacillaceae* family was the primary hypothesis.
